# Supplementary material for: Evaluation of Hospitalized Patients with Community-Acquired Influenza-Like Illness During Two Influenza Seasons
Source: PubMed Central journal article supplement — Infect Dis Clin Microbiol. 2023 Dec 29;5(4):323–31. doi: 10.36519/idcm.2023.285 (PMC10986686; doi:10.36519/idcm.2023.285), 2023-12-29
Supplement: IDCM-5-4-285_Supplementary1-2.pdf [file IDCM-5-4-285_Supplementary1-2.pdf]

**Supplement Table 1.** Evaluation of differences between influenza subtypes.

|                                                | <b>H1N1 (n=12)<br/>n (%)</b> | <b>H3N2 (n=22)<br/>n (%)</b> | <b><i>p</i></b> |
|------------------------------------------------|------------------------------|------------------------------|-----------------|
| Age, median (IQR)                              | 70 (58.25-79.75)             | 66 (53.75-80)                | 0.901           |
| Male                                           | 3 (25)                       | 7 (31.8)                     | 0.674           |
| Female                                         | 9(75)                        | 15(68.2)                     |                 |
| Fever                                          | 9 (75)                       | 12 (54.5)                    | 0.233           |
| Weakness                                       | 10 (83.3)                    | 18 (81.8)                    | 0.912           |
| Myalgia                                        | 3 (25)                       | 8 (36.4)                     | 0.494           |
| Headache                                       | 2 (16.7)                     | 9 (40.9)                     | 0.136           |
| Cough                                          | 12 (100)                     | 19 (86.4)                    | 0.096           |
| Sore throat                                    | <b>8 (66.7)</b>              | <b>6 (27.3)</b>              | <b>0.025</b>    |
| Dyspnea                                        | 11 (91.7)                    | 18 (81.8)                    | 0.421           |
| Symptom duration, median (IQR)                 | 4 (3-4)                      | 3.5 (3-6)                    | 0.711           |
| Comorbidities                                  | 11 (91.7)                    | 18 (81.8)                    | 0.421           |
| Asthma                                         | 3 (25)                       | 3 (13.6)                     | 0.414           |
| DM                                             | 4 (33.3)                     | 8 (36.4)                     | 0.859           |
| Solid organ malignancy                         | 4 (33.3)                     | 4 (18.2)                     | 0.327           |
| Cardiovascular disease                         | 8 (66.7)                     | 14 (63.6)                    | 0.859           |
| Hematological malignancy                       | 0                            | 1 (4.5)                      | 0.346           |
| COPD                                           | 4 (33.3)                     | 8 (36.4)                     | 0.859           |
| Creatinine, median (IQR), mg/dL                | 1.04 (0.80-1.48)             | 1.06 (0.91-1.32)             | 0.885           |
| WBC, median (IQR), x10 <sup>3</sup> /μL        | 6919 (3695-10,915)           | 8094 (5999-13,186)           | 0.506           |
| Neutrophil, median (IQR), x10 <sup>3</sup> /μL | 4822 (2773-7774)             | 6646 (4674-10,811)           | 0,525           |
| Lymphocyte, median (IQR), x10 <sup>3</sup> /μL | 673 (326-885)                | 930 (550-1910)               | 0,179           |
| ALT, median (IQR), U/L                         | 24.5 (14.5-36)               | 23 (14.75-31.25)             | 0.763           |
| AST, median (IQR), U/L                         | 38.5 (19.25-57.75)           | 31.5 (21.5-45)               | 0.683           |
| CRP, median (IQR), mg/L                        | 135 (65-218)                 | 64.5 (23.50-105)             | 0.255           |
| Vaccinated in the same season                  | 3 (25)                       | 5 (22.7)                     | 0.882           |
| Vaccinated in the previous season              | 6 (50)                       | 5 (22.7)                     | 0.104           |
| Antiviral use                                  | 5 (41.7)                     | 7 (31.8)                     | 0.566           |
| Antibiotic use                                 | 12 (100)                     | 22 (100)                     |                 |
| Pneumonia                                      | 6 (50)                       | 11 (50)                      | 1.000           |
| Mechanical ventilation                         | 5 (41.7)                     | 8 (36.4)                     | 0.761           |
| Intensive care hospitalization                 | 3 (25)                       | 5 (22.7)                     | 0.882           |
| Exitus                                         | 1 (8.3)                      | 3 (13.6)                     | 0.638           |

**IQR:** Interquartile range, **DM:** Diabetes mellitus, **COPD:** Chronic obstructive pulmonary disease, **WBC:** White blood cell, **ALT:** Alanine aminotransferase, **AST:** Aspartate aminotransferase, **CRP:** C-reactive protein.

**Supplement Table 2.** Evaluation of influenza-positive patients with and without pneumonia.

|                                                | <b>Patients with pneumonia (n=19)<br/>n (%)</b> | <b>Patients without pneumonia (n=18)<br/>n (%)</b> | <i>p</i>    |
|------------------------------------------------|-------------------------------------------------|----------------------------------------------------|-------------|
| Age, median (IQR)                              | 73 (62.0-81.0)                                  | 68 (48.5-74.7)                                     | 0.110       |
| Male                                           | 13 (68.4)                                       | 13 (72.2)                                          | 0.800       |
| Female                                         | 6(31.6)                                         | 5(27.8)                                            |             |
| BMI                                            | 26 (22-29)                                      | 26 (22.7-33.5)                                     | 0.103       |
| Smoking                                        | 3 (15.7)                                        | 3 (16.6)                                           | 0.673       |
| Fever                                          | 13 (68.4)                                       | 11 (61.1)                                          | 0.642       |
| Weakness                                       | 16 (84.2)                                       | 14 (77.7)                                          | 0.618       |
| Myalgia                                        | 7 (36.8)                                        | 6 (33.3)                                           | 0.823       |
| Cough                                          | 18 (94.7)                                       | 14 (77.7)                                          | 0.132       |
| Sore throat                                    | 6 (31.5)                                        | 10 (55.5)                                          | 0.141       |
| Headache                                       | 5 (26.3)                                        | 7 (38.8)                                           | 0.414       |
| Dyspnea                                        | 17 (89.4)                                       | 14 (77.7)                                          | 0.335       |
| Symptom duration, median (IQR)                 | 4 (3-6)                                         | 4 (3-5.25)                                         | 0.378       |
| Comorbidities                                  | 16 (84.2)                                       | 16 (88.8)                                          | 0.676       |
| Asthma                                         | 4 (21.0)                                        | 2 (11.1)                                           | 0.408       |
| DM                                             | 6 (31.5)                                        | 7 (38.8)                                           | 0.642       |
| Solid organ malignancy                         | 4 (21.0)                                        | 4 (22.2)                                           | 0.931       |
| Cardiovascular disease                         | 12 (63.1)                                       | 13 (72.2)                                          | 0.556       |
| COPD                                           | 5 (26.3)                                        | 8 (44.4)                                           | 0.248       |
| Creatinine, median (IQR), mg/dL                | 1.05 (0.85-1.4)                                 | 1.06 (0.95-1.29)                                   | 0.988       |
| WBC, median (IQR), x10 <sup>3</sup> /uL        | 7680 (5314-9618)                                | 9150 (6967-13,188)                                 | 0.488       |
| Neutrophil, median (IQR), x10 <sup>3</sup> /uL | 6145 (3736-7795)                                | 6900 (4970-10,924)                                 | 0.546       |
| Lymphocyte, median (IQR), x10 <sup>3</sup> /uL | 674 (446-1003)                                  | 905 (483-1910)                                     | 0.267       |
| Creatine kinase*, median (IQR), U/L            | 208 (66.5-325)                                  | 210 (66.7-502)                                     | 0.907       |
| ALT, median (IQR), U/L                         | 22 (12-30)                                      | 27 (17.5-37.2)                                     | 0.089       |
| AST, median (IQR), U/L                         | 32 (18-51)                                      | 29.5 (24.5-47.2)                                   | 0.627       |
| CRP**, median (IQR), mg/L                      | 95 (50-195)                                     | 57 (22-97.5)                                       | 0.057       |
| Vaccinated in the same season                  | <b>2 (10.5)</b>                                 | <b>7 (38.8)</b>                                    | <b>0.04</b> |
| Vaccinated in the previous season              | 5 (26.3)                                        | 7 (38.8)                                           | 0.414       |
| H1N1                                           | 6 (31.5)                                        | 6 (33.3)                                           | 0.909       |
| H3N2                                           | 11 (57.8)                                       | 11 (61.1)                                          | 0.842       |
| Antiviral use                                  | 10 (52.6)                                       | 5 (27.7)                                           | 0.124       |
| Antibiotic use                                 | 19 (100)                                        | 18 (100)                                           |             |
| Mechanical ventilation                         | 7 (36.8)                                        | 7 (38.8)                                           | 0.898       |
| Intensive care hospitalization                 | 5 (26.3)                                        | 4 (22.2)                                           | 0.772       |
| Exitus                                         | 3 (15.7)                                        | 1 (5.5)                                            | 0.316       |

**IQR:** Interquartile range, **DM:** Diabetes mellitus, **COPD:** Chronic obstructive pulmonary disease, **WBC:** White blood cell, **ALT:** Alanine aminotransferase, **AST:** Aspartate aminotransferase, **CRP:** C-reactive protein.

\*Tested in 24 patients. \*\*Tested in 22 patients.
